# Supplementary material for: Single-cell RNA reveals a tumorigenic microenvironment in the interface zone of human breast tumors
Source: Springer Nature journal article supplement (doi:10.1186/s13058-023-01703-7), 2023-08-29
Supplement: MOESM1 [file 25976056]

**Single-cell RNA reveals a tumorigenic microenvironment in the interface zone of human breast tumors**

Wei Yang<sup>1</sup>, Meiyu Xu<sup>1</sup>, Shuoqi Xu<sup>1</sup>, Qingxian Guan<sup>1</sup>, Shuaiming Geng<sup>1</sup>, Juanhong Wang<sup>2</sup>, Wei Wei<sup>2</sup>, Hongwei Xu<sup>3</sup>, Ying Liu<sup>3</sup>, Yong Meng<sup>4</sup>, Ming-Qing Gao<sup>4\*</sup>

<sup>1</sup>College of Life Sciences, Northwest University, Xi'an, China.

<sup>2</sup>Department of Pathology, Xi'an No.3 Hospital, the Affiliated Hospital of Northwest University, Xi'an, China.

<sup>3</sup>Basic Medical College, Qingdao University, Qingdao, China.

<sup>4</sup>School of Medicine, Northwest University, Xi'an, China.

\*Corresponding author: gaomingqing@nwu.edu.cn.

## Supplementary Materials

### (Table S1 – S4 and Figure S1 – S3)

**Table S1.** Clinical parameters of the three breast cancer patients

| Patients | Histology | WHO Grade | Her2 status | ER status | PR status | ki67 | P53 |
|----------|-----------|-----------|-------------|-----------|-----------|------|-----|
| 1        | IBC-NST   | 2         | 1+          | 80%+      | 70%+      | 15%+ | +   |
| 2        | IBC-NST   | 2         | 3+          | -         | -         | 40%  | +   |
| 3        | IBC-NST   | 2         | 2+          | 90%+      | 90%+      | 30%  | Pos |

WHO, World Health Organization; ER, estrogen receptor; Her2, human epidermal growth factor receptor 2; PR, progesterone receptor; IBC-NST, Invasive breast carcinoma of no special type.

**Table S2.** PCR primer sequence

| Gene   | Forward Primer       | Reverse Primer          |
|--------|----------------------|-------------------------|
| GAPDH  | GGAGTCCACTGGCGTCTTCA | GTCATGAGTCCTTCCACGATACC |
| BMPR1B | GAGGATGACTCTGGGTTGCC | AGGCAGTGTAGGGTGTAGGT    |

**Table S3.** The specific information for each sample

| patient | zone      | High quality cells | mean reads/cell | total genes |
|---------|-----------|--------------------|-----------------|-------------|
| 1       | tumor     | 11108              | 19727           | 35955       |
| 1       | interface | 12645              | 23938           | 36286       |
| 1       | normal    | 13589              | 20801           | 35989       |
| 2       | tumor     | 9597               | 38123           | 36618       |
| 2       | interface | 8539               | 32706           | 36680       |
| 2       | normal    | 8960               | 36773           | 36821       |
| 3       | tumor     | 8013               | 36323           | 36676       |
| 3       | interface | 8008               | 55136           | 37655       |
| 3       | normal    | 8089               | 34588           | 36065       |

**Table S4.** Numbers of immune cells with immune hot and cold activities

| Patients | Zones     | cluster 0       | cluster 1       | cluster 2        | cluster 3       | cluster 4       | cluster 5       | cluster 6       | cluster 7       | cluster 8       | Total cell<br>Number (hot) | Total cell<br>Number<br>(cold) |
|----------|-----------|-----------------|-----------------|------------------|-----------------|-----------------|-----------------|-----------------|-----------------|-----------------|----------------------------|--------------------------------|
|          |           | (CD8+ T)<br>hot | (CD4+ T)<br>hot | (CD4+ T)<br>cold | (Tregs)<br>cold | (CD8+ T)<br>hot | (CD8+ T)<br>hot | (Tregs)<br>cold | (CD8+ T)<br>hot | (CD4+ T)<br>hot |                            |                                |
| 1        | Normal    | 607             | 59              | 434              | 0               | 120             | 47              | 6               | 1               | 0               | 834                        | 440                            |
| 1        | Interface | 961             | 56              | 373              | 0               | 64              | 65              | 14              | 0               | 0               | 1146                       | 387                            |
| 1        | Tumor     | 812             | 60              | 330              | 1               | 134             | 34              | 317             | 7               | 3               | 1050                       | 648                            |
| 2        | Normal    | 73              | 35              | 75               | 1               | 60              | 60              | 20              | 4               | 3               | 235                        | 96                             |
| 2        | Interface | 20              | 985             | 33               | 174             | 381             | 94              | 507             | 73              | 127             | 1680                       | 714                            |
| 2        | Tumor     | 15              | 63              | 46               | 1175            | 297             | 19              | 141             | 829             | 764             | 1987                       | 1362                           |
| 3        | Normal    | 36              | 75              | 21               | 0               | 9               | 195             | 0               | 0               | 2               | 317                        | 21                             |
| 3        | Interface | 4               | 93              | 19               | 0               | 4               | 320             | 1               | 0               | 3               | 424                        | 20                             |
| 3        | Tumor     | 37              | 207             | 138              | 2               | 138             | 312             | 88              | 7               | 5               | 706                        | 228                            |

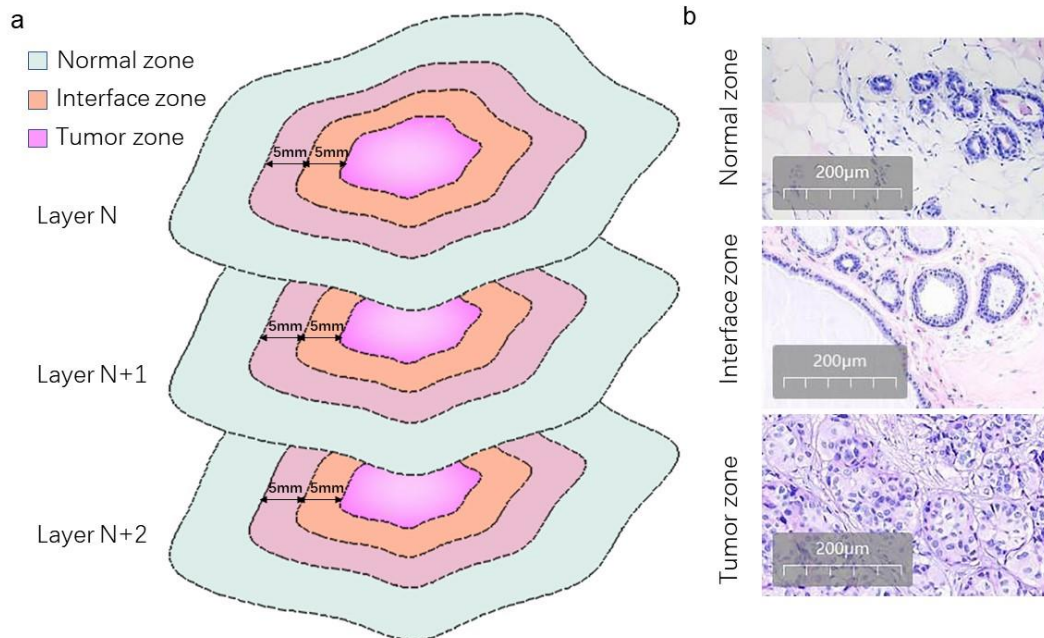

**Figure S1. Identification and collection of representative samples.** **a** Breast cancer tissues from the normal zone, interface zone and tumor zone were acquired by macroscopic dissection based on geographical mapping. Layer N, N+1, N+2 represented three continuous sections that have similar tumor boundary in the cutting surface. **b** Histological appearances of the normal, interface and tumor zone confirmed by hematoxylin and eosin (H&E) staining of representative tissues.

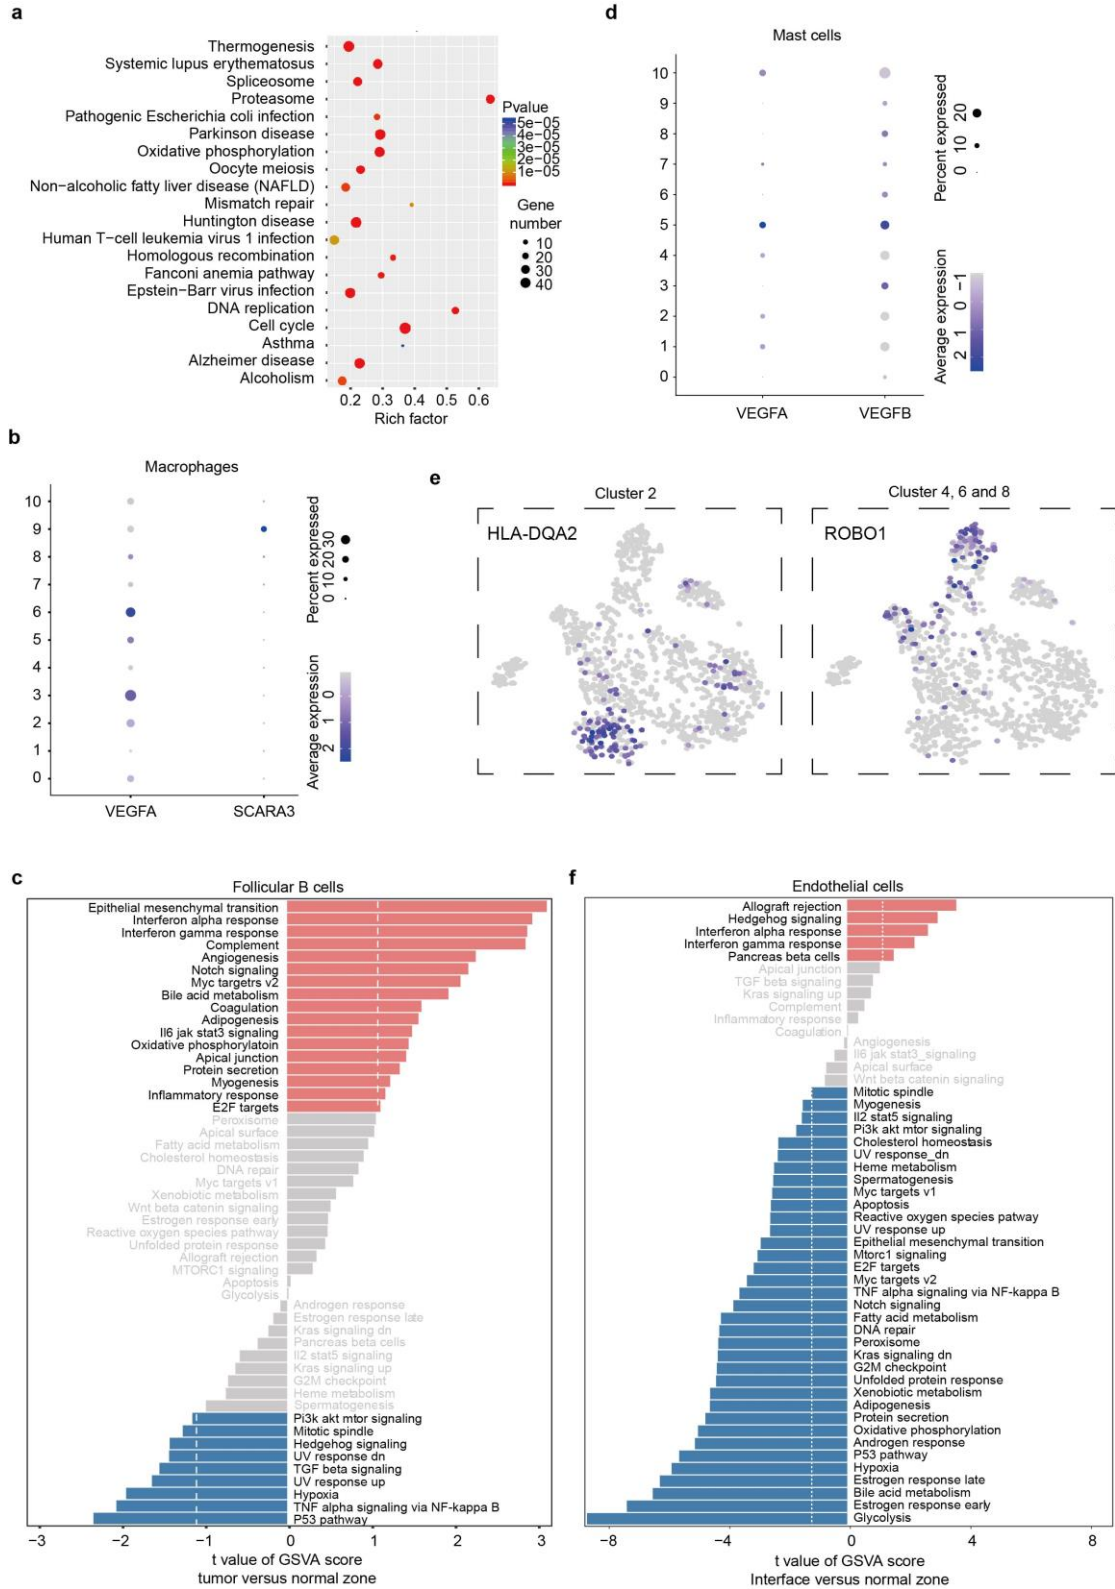

**Figure S2. Gene expression and pathway analysis in stromal cells. a** Kyoto Encyclopedia of Genes and Genomes (KEGG) pathway analyses of marker genes in TOP2A+ T cells. **b** Bubble plots displaying expressions of selected genes in macrophage clusters. **c** Differences in pathway activity of each cell scored by GSEA between follicular B cells isolated from normal and tumor zones. **d** Bubble plots displaying the expression of selected genes in mast cell clusters. **e** tSNE

plots of the specific gene expression of endothelial cell clusters. **f** Differences in pathway activity of each cell scored by GSVA between endothelial cells isolated from normal and interface zones.

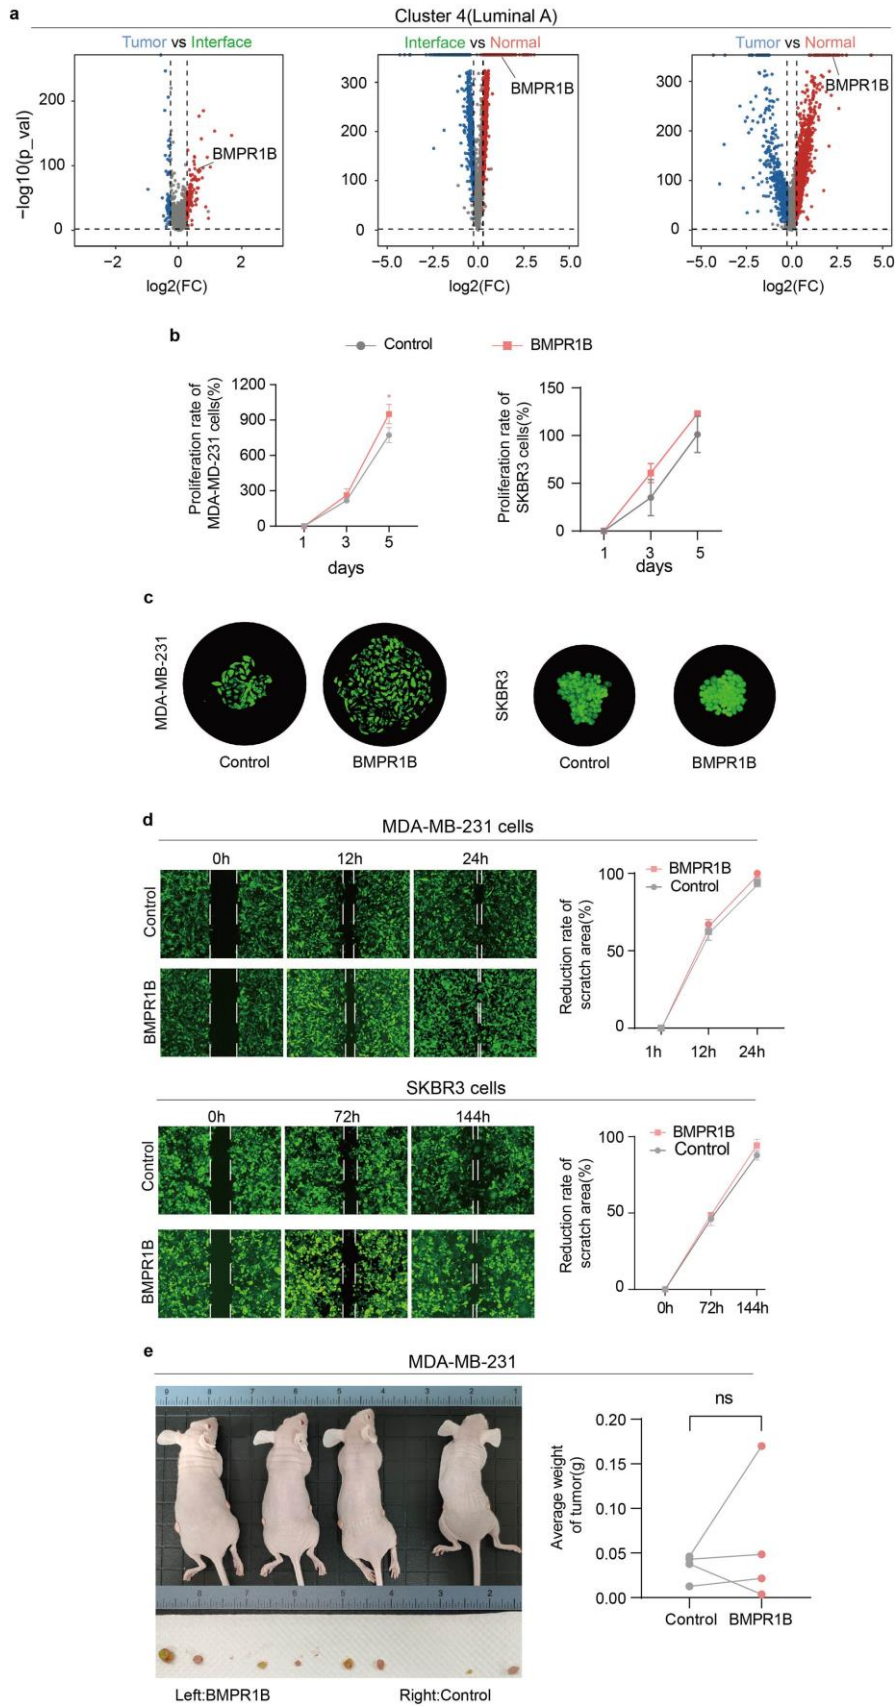

**Figure S3. The expression and function of BMPR1B gene in epithelial cells.** **a** Volcano plots of BMPR1B gene expression in cluster 4 from different zones here (left to right): Tumor zone versus interface zone, interface zone versus normal zone and tumor zone versus normal zone. **b** Line chart of cell proliferation measured at 450 nm. Cells with raw vector served as control group. **c** Photos of cell clones observed under a microscope. Cloning formation of BMPR1B-expressing MDA-MB-231 and SKBR3 cells versus matched cells with raw vectors. **d** Wound-healing assay of MDA-MB-231 and SKBR3 cells with or without BMPR1B overexpression. Left: representative images of BMPR1B-overexpressed cells and control cells at three time point after wounding. Right: quantification of the reduction rate of scratch area (mean±SD). **e** Photographs of BALB/cNj-Foxn1<sup>nu</sup>/Gpt mice. (left) BMPR1B-overexpressed MDA-MB-231 cells and control cells with raw vector were respectively injected into subcutaneous location of left and right groin in nude mice. 8th week post-transplantation, mice were photographed, and tumors were removed surgically and weighed. (right) Statistical analysis of mice tumor weights, (n = 3, t test).
